# Supplementary material
Source: PubMed Central journal article supplement (PMC2665105)
Supplement: M807084200_1.pdf [file M807084200_1.pdf]

## SUPPLEMENTAL DATA

**Table S1.** The fibrinogen-related proteins in *Anopheles gambiae*.

| FBN#  | FREP#  | New Ensembl Transcript ID | Old Ensembl Transcript ID | Old Ensembl Gene ID | VectorBase ID | Chr. Location | Truncated | Size (a.a) |
|-------|--------|---------------------------|---------------------------|---------------------|---------------|---------------|-----------|------------|
| FBN1  | FREP3  | T15012                    | T15012                    | G12523              | AGAP011307    | 3L/42B        | 3'-T      | 175        |
| FBN2  |        | T11265                    | T11265                    | G08776              | AGAP011228    | 3L/42A        | T         | 198        |
| FBN3  | FREP18 | G08773                    | T11262                    | G08773              |               | 3L/42A        | 3'-T      | 347        |
| FBN4  | FREP29 | T15683                    | T08256                    | G06227              | AGAP011276    | 3L/42B        | 3'-T      | 230        |
| FBN5  | FREP5  | T08288                    | T08288                    | G06254              | AGAP011226    | 3L/42A        | 5'-T      | 199        |
| FBN6  | FREP59 | T15644                    | T15644                    | G13155              | AGAP011231    | 3L/42A        | 3'-T      | 274        |
| FBN7  | FREP60 | T08282                    | T08282                    | G06248              | AGAP011239    | 3L/42A        | 3'-T      | 267        |
| FBN8  | FREP57 | T11296                    | T11252                    | G08763              | AGAP011223    | 3L/42A        | 3'-T      | 214        |
| FBN9  | FREP13 | T11248                    | T11248                    | G08759              | AGAP011197    | 3L/42A        | 3'-T      | 282        |
| FBN10 | FREP58 | T15680                    | T15680                    | G13191              | AGAP011230    | 3L/42A        | T         | 176        |
| FBN11 | FREP28 | T26109                    | T11293                    | G08804              | AGAP011225    | 3L/42A        | 3'-T      | 255        |
| FBN12 | FREP2  | T20573                    | T20573                    | G18084              | AGAP010531    | 3L/39A        | full      | 283        |
| FBN13 | FREP23 | G19285                    | T21774                    | G19285              |               | 3L/40A        | 3'-T      | 204        |
| FBN14 | FREP19 | T21297                    | T21297                    | G18808              | AGAP010811    | 3L/40A        | full      | 291        |
| FBN15 | FREP15 | T12794                    | T12794                    | G10305              | AGAP012539    | UNKN          | full      | 372        |
| FBN16 | FREP54 | T29613                    | T19675                    | G17186              |               | 3L/39C        | 3'-T      | 212        |
| FBN17 | FREP22 | T30368                    | T19654                    | G17165              | AGAP010773    | 3L/39C        | 3'-T      | 142        |
| FBN18 | FREP55 | T20281                    | T20281                    | G17792              | AGAP010772    | 3L/39C        | 3'-T      | 320        |
| FBN19 | FREP27 | T19678                    | T19684                    | G17195              | AGAP010774    | 3L/39C        | 3'-T      | 231        |
| FBN20 | FREP21 | T27497                    | T20238                    | G17749              | AGAP010763    | 3L/39C        | 3'-T      | 267        |
| FBN21 | FREP51 | T19647                    | T19678                    | G17189              |               | 3L/39C        | 3'-T      | 214        |
| FBN22 | FREP26 | T20282                    | T20282                    | G17793              | AGAP010775    | 3L/39C        | T         | 199        |
| FBN23 | FREP30 | T18192                    | T18192                    | G15703              | AGAP010869    | 3L/40B        | 3'-T      | 268        |
| FBN24 | FREP10 | T02335                    | T02335                    | G01963              |               | 2L/20D        | full      | 287        |
| FBN25 | FREP63 | T21318                    | T21318                    | G18829              | AGAP004918    | 2L/20D        | full      | 305        |
| FBN26 | FREP62 | T16439                    | T11448                    | G08959              | AGAP012651    | UNKN          | full      | 284        |
| FBN27 | FREP43 | T10854                    | T10854                    | G08365              | AGAP004996    | 2L/21A        | full      | 423        |
| FBN28 | FREP64 | T11478                    | T11478                    | G08989              | AGAP004997    | 2L/21A        | full      | 436        |
| FBN29 | FREP14 | T32176                    | T11521                    | G09032              | AGAP012650    | UNKN          | 3'-T      | 261        |
| FBN30 | FREP8  | T21698                    | T21698                    | G19209              | AGAP006914    | 2L/26B        | full      | 280        |
| FBN31 | FREP34 | T20268                    | T20268                    | G17779              | AGAP006790    | 2L/26A        | full      | 272        |
| FBN32 | FREP39 | T07635                    | T07635                    | G05762              | AGAP007041    | 2L/26D        | full      | 370        |
| FBN33 | FREP65 | T20316                    | T20316                    | G17827              | AGAP006743    | 2L/25D        | full      | 330        |
| FBN34 | FREP16 | T11564                    | T11564                    | G09075              | AGAP001554    | 2R/8B         | full      | 548        |
| FBN35 | FREP48 | T11308                    | T11308                    | G08819              | AGAP002005    | 2R/10A        | 5'-T      | 246        |
| FBN36 | FREP46 | T16460                    | T13811                    | G11322              | AGAP012000    | 3L/45A        | full      | 322        |
| FBN37 | FREP9  | T19563                    | T19563                    | G17074              | AGAP009042    | 3R/33B        | full      | 653        |
| FBN38 | FREP42 | T10235                    | T10235                    | G07746              | AGAP009728    | 3R/35C        | 3'-T      | 233        |
| FBN39 | FREP40 | T21380                    | T21380                    | G18891              | AGAP000806    | X/5A          | full      | 326        |
| FBN50 | FREP44 | T22867                    |                           |                     | AGAP005848    | 2L/23B        | full      | 299        |

|       |        |        |  |  |            |        |      |     |
|-------|--------|--------|--|--|------------|--------|------|-----|
| FBN51 | FREP50 | T29396 |  |  | AGAP009556 | 3R/34C | 3'-T | 190 |
|       | FREP1  | T26193 |  |  | AGAP007031 | 2L/26C | full | 738 |
|       | FREP4  | T32282 |  |  | AGAP010762 | 3L/39C | 3'-T | 279 |
|       | FREP6  |        |  |  | AGAP011277 | 3L/42B | T    | 194 |
|       | FREP7  | T22610 |  |  | AGAP009184 | 3R/33C | 3'-T | 314 |
|       | FREP11 |        |  |  | AGAP004916 | 2L/20D | full | 309 |
|       | FREP12 | T30878 |  |  | AGAP004917 | 2L/20D | full | 298 |
|       | FREP17 |        |  |  | AGAP010760 | 3L/39C | 3'-T | 220 |
|       | FREP20 |        |  |  |            | 3L/39C | full | 323 |
|       | FREP25 | T29579 |  |  |            | 3L/39C | 3'-T | 306 |
|       | FREP31 |        |  |  |            | UNKN   | T    | 209 |
|       | FREP32 | T30831 |  |  | AGAP010759 | 3L/39C | 3'-T | 241 |
|       | FREP36 | T30748 |  |  | AGAP004999 | 2L/21A | full | 284 |
|       | FREP37 | T30361 |  |  |            | 3L/42A | full | 290 |
|       | FREP38 | T30362 |  |  |            | 3L/42A | full | 293 |
|       | FREP41 |        |  |  |            | 3L/42A | T    | 235 |
|       | FREP47 |        |  |  |            | UNKN   | T    | 156 |
|       | FREP49 | T16440 |  |  | AGAP004998 | 2L/21A | full | 294 |
|       |        |        |  |  | AGAP011224 | 3L/42A | 3'-T | 167 |

FBN#: IDs from [40] ; FREP#: FREP IDs from the CEGG database [37]; the corresponding new Ensembl transcript ID #; the old designations (with abbreviations), with only the last 5 digits shown (ENSANGT#); the new VectorBase ID (AGAP#); chromosomal locations (Chr. location), FBG domain truncated (T denotes truncated), UNKN denotes unknown location.

**Table S2. Primers used for semi-quantitative RT-PCR analysis, *dsRNA* synthesis, and RNAi gene silencing verification primers together with silencing efficiency.**

| FBN#  | Forward Primer       | Reverse Primer        | PCR length (bp) | RNAi Verification Primer Forward | KD% ( $\pm$ SE) |
|-------|----------------------|-----------------------|-----------------|----------------------------------|-----------------|
| FBN1  | ATCGCTGAAGCCATGTTGAT | GCGTGCTTCATTCTGTGTGT  | 361             | AAGAGAATATTGAACTA                | 78 ( $\pm$ 12)  |
| FBN2  | AGTTTCGGAGGAGGTTGGTT | CATCCTCCACGATCAGGTCT  | 386             |                                  |                 |
| FBN3  | GCAGACCACCTACCAGTCGT | TGCCAATCTCGAAGTGTCTG  | 359             | TCGAGTAGAATGCTTGCC               | 62 ( $\pm$ 16)  |
| FBN4  | GGACTTTTACCGCAACTGGA | TTGTGCACAGTTTCCACCAT  | 322             | GGCTTGTGTCCAGTACC                | 69 ( $\pm$ 8)   |
| FBN5  | AGGATGGCTTGTGTTCCAGT | CATCATTTTCCCGATCCTTG  | 335             | GACCAGACTACATTCCGG               | 70 ( $\pm$ 18)  |
| FBN6  | GGACTTTTACCGCAATTGGA | GTACCACCATGCTCCCTCAT  | 346             | GTGTTCCAGCATCGTTACG              | 58 ( $\pm$ 13)  |
| FBN7  | GCCATTCTGGGATACTGTG  | CAATGAGTTTCCCTGCCGTTT | 325             | CCTGCTGAAAAATGAAGAGCC            | 75 ( $\pm$ 18)  |
| FBN8  | TTCAAGGGCAATTTTGGTTC | ATATTGTTCCGCCTCACTGC  | 387             | CCACGAACAAATGCGGAACG             | 71 ( $\pm$ 6)   |
| FBN9  | CCAAGATGTCGGGCAAGTAT | TTGTGGTACGTCAGCGAGTC  | 402             | CGCTCCCTGTTTCGAGCTGCA            | 56 ( $\pm$ 18)  |
| FBN10 | TGTCTGGAGCCATCAGTCAG | TAAATCGGTGCTGGAACACA  | 339             | GTGGGCCATCGATCAAAAAGC            | 78 ( $\pm$ 14)  |
| FBN11 | ACACGTTTTGGAGGAGGTTG | CCACCATGCTCCCTGTACT   | 396             | TCATTACCCGTTTCGTGGGAC            | 67 ( $\pm$ 9)   |
| FBN12 | GGAAGCAGCCACGACATTAT | TCGAGGCCTAACCAATGTTC  | 378             | GCAGTTATCTGTGCTCTG               | 56 ( $\pm$ 17)  |
| FBN13 | AGGAACCATCAAAGCAATCG | TGGTAGTTCAACCCGCTCTCC | 388             | CGAAACTTCTCGTTCG                 | 67 ( $\pm$ 18)  |
| FBN14 | CAATCAGCAAAGCCAGACAA | CAGAACTCCCATCAATGCT   | 396             | GACGCAAGGCTTATTAAC               | 56 ( $\pm$ 17)  |
| FBN15 | GGTGGAGCTGAAAGACTTCG | TTTGGTTTACGGATCATCA   | 355             |                                  |                 |
| FBN16 | CGCACGGTATGATGAATTTG | AGTTTCGGAATGGATGCTTG  | 374             | CGGCTCAAAAGCACGAGC               | 40 ( $\pm$ 7)   |
| FBN17 | GCAAGGAAGAGCCATCAAAG | TGCTAACGGAAATGCTCCT   | 347             | GCTCGGTTTAAAGCCAG                | 82 ( $\pm$ 12)  |

|       |                      |                      |     |                       |          |
|-------|----------------------|----------------------|-----|-----------------------|----------|
| FBN18 | ACAACCAACGGAGAAGGATG | AACTTCATGCCCTTGTGGAC | 369 |                       |          |
| FBN19 | GGACTTTTACCGCAACTGGA | GTGCCACCATGCTCCTTAT  | 346 | GGAGGTTGGTTAGTGTCC    | 63 (±15) |
| FBN20 | AACAGACTGCTTTCGGAGGA | CACCTCCTTGACACTGGTT  | 397 | GATGAGCCATTCCTGGG     | 70 (±17) |
| FBN21 | TGCACGATTGTGACCATT   | GCGGATATTGGTCTCCTCA  | 398 | GCGTCAAAGAAAGATCTTGC  | 66 (±18) |
| FBN22 | TTTCCTGGGATATTGCGAAC | CCACCGAACAGCTATCATT  | 384 | CCTAATAAAGCCTAACAA    | 78 (±17) |
| FBN23 | AGCGTATCGGAATGGTTTTG | GCCATTTTTGTAGCGTCCAT | 358 |                       |          |
| FBN24 | TGCACCATTGCTTCTTCTG  | CCGAATACTTTTGGCCTTCA | 338 | GAAAGAAAACGAAATAAACG  | 75 (±12) |
| FBN25 | GATTGCTTGCGAAAATGTA  | TCCGTCAAACGATGCTGTA  | 371 | GGGATTGTTTTGCTGATT    | 74 (±16) |
| FBN26 | GGACGCAATTGCCTACCTTA | ACTGTGCCAGCGAGGTTATC | 359 | GTGTGCCGGGTATTCAGGT   | 65 (±8)  |
| FBN27 | CGCCAAGGAGAGTACAGACC | CAGCAGATGAACAACCTCGT | 321 | CCGAATCTATTCTGGATCTGG | 80 (±15) |
| FBN28 | TCAAGAAAACGGGCACCTAC | GAAGCCCTTCAGCTCAAGA  | 344 | GGATCTACTTCTTGTGAGG   | 75 (±12) |
| FBN29 | TCCTCAGTCGCTGTGTTTTG | CCGAAGCCGTTCTGATAGTC | 369 |                       |          |
| FBN30 | TTGCCGCTAGTGTGATCTG  | TCAAACCAAGCCAATGTCA  | 363 | GTGCAAATTACCCACCGTC   | 65 (±17) |
| FBN31 | CCAGGGTCAGTGGCATATTT | ATGTATCCATCGTCCGCATT | 328 | GCTCGTGCCGCGAGGTCCC   | 77 (±7)  |
| FBN32 | CGATGGTACGGTCGATTTCT | CCGTGATAGTACGACGGACA | 333 | GGCTTGTCTCCAGCAGCGG   | 67 (±8)  |
| FBN33 | TACCAGATACGGCCCGAGTA | GTACCGCTGTATCCGTCGAT | 341 | CCCGTTCGCAGCGTCCGGCG  | 52 (±12) |
| FBN34 | GCTACGACGACAATGTGGAG | CTGCCAAACGTAAGAGCACA | 241 |                       |          |
| FBN35 | CGAGGGAAAATCTCATCGAA | CGTCAAAGTCCTCCAGCAGT | 372 |                       |          |
| FBN36 | TTCGGTGGTAATTGGATCGT | TATCTTGATCGTGCGTGGA  | 337 |                       |          |
| FBN37 | ACGAGGACTGAACGACTGT  | GATCATCATGGTCGCCTTCT | 187 | GGCGGCTGGTGGTGAAG     | 75 (±17) |
| FBN38 | AGAAAAGCCGCGTGAGATAG | GTATTGCGTCGTTGGACCTT | 307 |                       |          |
| FBN39 | CGCTACACCCTGTTGAGAT  | TACTTGCGGCGCTTCTTAT  | 332 | GGCCGAATCGTTCAAGGGCG  | 58 (±10) |

KD% (± SE): denotes the gene silencing efficiency with standard errors from three replicates

```

10      20      30      40      50      60      70      80
.....|.....|.....|.....|.....|.....|.....|.....|.....|
Structure
Tachylectin5A GYRIWPKSWMT-VGTLN-----V*CDME---TDGG-GWIVIQRRGNPSDY-FYKPTKNYKLGFCGNIE-K
FREP3/FBN1      -----MLSDVYTIKPPAS-SVAEPFV*CECG-----YRKG-GWIVLSRRFDGSLN-FDRDWIDYRIGFCSPB-G
FREP24/FBN2     -----KQSGKYLQIPT--ENGELFLG*CEC-----VSFCGGWLVQHRMGMED-FDRNWTDYRN GFCSIG-G
FREP18/FBN3     TSYRACKKEEPSKVGKYLQIPT--ANDEPFLG*CEC-----TRFCGGWLVQHRFNGSVD-FYRNWTEYRN GFCGSD-G
FREP29/FBN4     VSFRSCKENPSKRSKYLQILT--ENDQEPFLG*CEC-----TAYCGGWLVQHRMDGSVD-FYRNWTEYRN GFCGSD-G
FREP5/FBN5      -----VFQY-----RFDGGSVD-FYRNWTEYRN GFCGSD-G
FREP59/FBN6     VSFRSCKKTPSKRSKYLQIPT--ENDEPFLG*CEC-----TSFCGGWLVQHRFNGSVD-FYRDWTEYRN GFCGSD-G
FREP60/FBN7     SPISSCKG---VTKKHLIQPT--ANDEPFLAI*CEE-----TSFCGGWLVQHRFNGSVD-FYRNWTEYRN GFCGSD-G
FREP57/FBN8     TPVRSCKEEPSKQSGKYLQIPT--ENDEPFG*CDQ-----TTFCGGWLVQHRFNGSLN-FYRNWTEYRN RFGSVD-G
FREP13/FBN9     GPFESCRDEPSKMSGKYLIRAS--NDVEPFLAI*CEC-----TKFCGGWLVQHRFNGSVD-FYRNWTEYRN GFCGSD-G
FREP58/FBN10    -----TRFCGGWLVQHRFNGSVD-FYRNWTEYRN GFCGSD-G
FREP28/FBN11    TSIRSCKAEPKSLSGKYLQIPT--ENHYEPFV*GCEC-----TRFCGGWLVQHRFNGSVD-FYRNWTEYRN GFCGSD-G
FREP2/FBN12     LKQDFEOKLAHQDQSGVYLQIRF-SNESPEV*FDGS--NNHGYGNNIVQRRFDGSLN-FYRNWTEYRN GFCNLD-G
FREP23/FBN13    M---CFTHGVRPLINTIDPHFIHP--YHTY--CTSSF-----CGGWLVQHRMDGALD-FYRDWTEYRN GFCGSD-G
FREP19/FBN14    VTFRSCKENPSQLSGKYLQIST--EADEPFLG*CEC-----TAFAGGWLVQHRMDGSVD-FYRNWTEYRN GFCGSD-G
FREP15/FBN15    ISFESCKENLSKRSKYLQIPT--ENDEPFLG*CAQ-----TAFCGGWLVQHRMDGSVD-FYRNWTEYRN GFCGSD-G
FREP54/FBN16    IAFESCKEILSKRSKYLKIPN--KNDEPFLG*CEC-----TAFCGGWLVQHRMDGSVD-FYRNWTEYRN GFCGSD-G
FREP22/FBN17    -----MY-R
FREP55/FBN18    ISFESCKEILSKRSKYLQIPS--KIDKPEFV*VCEC-----TAFCGGWLVQHRMDGSVD-FYRNWTEYRN GFCGSD-G
FREP27/FBN19    ISSRSCKNEVPSNKSGLKYLQIPS--KTNEPFLV*GCEC-----TAFCGGWLVQHRMDGSVD-FYRNWTEYRN GFCGSD-G
FREP21/FBN20    ISSGSCKEEPSKESGKYLQIST--EKDEPFLG*CEC-----TAFCGGWLVQHRMDGSVD-FYRNWTEYRN GFCGSD-G
FREP51/FBN21    ISFESCKEILSKRSKYLQIRS--KIDKPEFV*VCEC-----TAFCGGWLVQHRMDGSVD-FYRNWTEYRN GFCGSD-G
FREP26/FBN22    -----ENILKRSGLKYLQIPT--ENNKPEF*VCEC-----TAFCGGWLVQHRMDGSVD-FYRNWTEYRN GFCGSD-G
FREP30/FBN23    VLVRSCKEEPSKRGKYLKIPN--EHDEPFLG*CEC-----TSFCGGWLVQHRFNGSVD-FYRNWTEYRN GFCGSD-G
FREP10/FBN24    VYKS--CNKVPFTASGVNIRPENP-FKQEPITV*ICQE-----YESG-GWIVIQHRFDGSLN-FYRNWTEYRN GFCGSD-G
FREP63/FBN25    VYSS--CRKTP--AGGVYIQPEKP-FKEPITV*ICQE-----YESG-GWIVIQHRFDGSLN-FYRNWTEYRN GFCGSD-G
FREP62/FBN26    IYQS--CDDVTGP--PGLYRVRDGN--DVETHY*ICQE-----LLGG-GWIVIQRRTSGRIN-FYRNWTEYRN GFCGSD-G
FREP43/FBN27    IFTS--CDDSRITQIGTYLQVDAF--SEP-TKV*VCLD----FVSG-RWIVIQRRDGSVD-FYRNWTEYRN GFCGSD-G
FREP64/FBN28    IYSS--CEDPNIKKIGTYWIKANF--YKP-VKV*ICMLD----YGG--RWIVIQRRDGSVD-FYRNWTEYRN GFCGSD-G
FREP14/FBN29    SYKS--CSDVPPNSPSGVYKLRGE--FGSQKAI*CNMS----YAGG-GWIVIQRRFNGSVD-FYRNWTEYRN GFCGSD-G
FREP8/FBN30     LG---ELRPFPGADKLPAAGRS-NYRLEKIAELT--GGQNLAGDWLVQHRFNGSLN-FYRNWTEYRN GFCGSD-G
FREP34/FBN31    IYSS--CREVPSRVSGIFLKIISD--DARDMNL*ICDAH----ANDV-GWIVIQRRFNGSES-FYRNWTEYRN GFCGSD-G
FREP39/FBN32    LEHQIR--AAAHGSEEHENPDGR-ENGSPFV*SVSA--NNRLYCDGWLVQHRFDGSLN-FYRNWTEYRN GFCGSD-G
FREP65/FBN33    VYRS--CGKVPFAASGVYQIRPEYP-FKEPITV*ICQE-----YESG-GWIVIQRRFDGSLN-FYRNWTEYRN GFCGSD-G
FREP16/FBN34    GCHQILKRFSG-VITFAEVELNEA-RDFNRRI*CEFA---TCGP-ATTVVQRRDLOEN-FYRNWTEYRN GFCGSD-G
FREP48/FBN35    IYSS--CDDRIIKIGTYLQVDAF--TNS-MYV*ICSLD----FGQN-ATTVVQRRDGSVD-FYRNWTEYRN GFCGSD-G
FREP46/FBN36    LEHRLDQLPEQ--SGVYFMQPDPA-KNASFEV*IRDWT--NNHGFSGWLVQHRFNGSVD-FYRNWTEYRN GFCGSD-G
FREP9/FBN37     SCVDILMAGMR-QSGVYVYLRGT-TWFLKVI*CEQE-----IADG-GWIVIQRRFDGSLN-FYRNWTEYRN GFCGSD-G
FREP42/FBN38    ---S--CSEAPK--IGIVSLKLPN--NVS-TEVI*ICDAE----YDKG-GWIVIQRRFNGSVD-FYRNWTEYRN GFCGSD-G
FREP40/FBN39    RSCREIPDGMSGEELIYPSAGPAGGE-ELEV*ICDQFED----G-GWIVIQRRF-DGFVNFYRNWTEYRN GFCGSD-G
FREP44/FBN50    --AS--CRDVPKRVSGITRIDPDHP-FNEPMTV*ICDQ-----YEGG-GWIVIQRRFDGSLN-FYRNWTEYRN GFCGSD-G
FREP1/FBN**     KLPRICSQIERMRTAGTANQPGD--GGLYLIAEAEHHP*ICDQ-----YEGG-GWIVIQRRFDGSLN-FYRNWTEYRN GFCGSD-G
FREP11/FBN**    VYRS--CKETP--TIGVYMIQPEKP-FKEPITV*ICQE-----YESG-GWIVIQRRFDGSLN-FYRNWTEYRN GFCGSD-G
FREP12/FBN**    VYKS--CNAAPFASCGVHKIQPEKP-FKEPITV*ICQE-----YESG-GWIVIQRRFDGSLN-FYRNWTEYRN GFCGSD-G
FREP49/FBN**    SYKS--CSDVPPNSPSGVYKLRGE--FGSQKAI*CNMS----YAGG-GWIVIQRRFNGSVD-FYRNWTEYRN GFCGSD-G
FREP36/FBN**    IYQS--CDDVTGP--PGLYRVRDGN--DVETHY*ICQE-----LLGG-GWIVIQRRTSGRIN-FYRNWTEYRN GFCGSD-G
FREP32/FBN**    ISTRSCKEEPSNRIGELIQPT--QNDEPFLG*CEC-----TAFCGGWLVQHRMDGSVD-FYRNWTEYRN RFGSVD-G
FREP25/FBN**    IAARSCKQVQSERPKWFIQPA--ADSEPF*LGCAQ-----TAFCGGWLVQHRMDGSVD-FYRNWTEYRN GFCGSD-G
FREP20/FBN**    ISFRSCKENPSKRSKYLQIPS--KNDEPFLG*CEC-----TAFCGGWLVQHRMDGSVD-FYRNWTEYRN GFCGSD-G
FREP7/FBN**     VSFRSCKGNPSKRSKYLQIPA--ETDEPFLG*CEC-----TAYCGGWLVQHRMDGSVD-FYRNWTEYRN GFCGSD-G
FREP6/FBN**     -----MILQILT--ENDQEPFLG*CEC-----TAYCGGWLVQHRMDGSVD-FYRNWTEYRN GFCGSD-G
FREP41/FBN**    -----EEPSKQSGKYLQIPT--ENDEPFG*CDQ-----TTFCGGWLVQHRFNGSLN-FYRNWTEYRN RFGSVD-G
FREP47/FBN**    -VAPIGRSRLCFLAPTDLSGR---PELAAPSC*TEP---TVT-----REDNSL-HQR-----SID-G
FREP31/FBN**    MRKGRFQKSVFQISMMMMMT---PGSFAWKRI*STS---TTTAFCGGWLVQHRMDGSVD-FYRNWTEYRN GFCGSD-G
FREP37/FBN**    ISSRSCKAAGQEQSGKFLIQPT--EHDEPFLG*CVQ-----YSGGNLIIQHRNRRLEVDYRNWTEYRN GFCNVE-E
FREP38/FBN**    ISSRSCKAAGQEQSGKFLIQPT--EHDEPFLG*CVQ-----TNGCGWLVQHRNRRWLD-FYRNWTEYRN GFCGSD-E
FREP17/FBN**    ISTRSCKEEPSNRIGELIQPT--QNDEPFLG*CEC-----TAFCGGWLVQHRMDGSVD-FYRNWTEYRN GFCGSD-G
FREP4/FBN**     ISSRSCKEEPSKESGKYLQIPT--EKDEPFLG*CEC-----TAFCGGWLVQHRMDGSVD-FYRNWTEYRN GFCGSD-G
AGAP011224     VSFRSCKTNPSKRSKYLQIPS--ENDEPFLG*CEC-----SNFCGGWLVQHRFNGSVD-FYRNWTEYRN GFCGSD-G
FREP50/FBN51    ---KVCSEP-----BYNV*ICQIT---FED--GSWVVIYRRFDGPDHFNQYRNWTEYRN GFCGSD-G

```



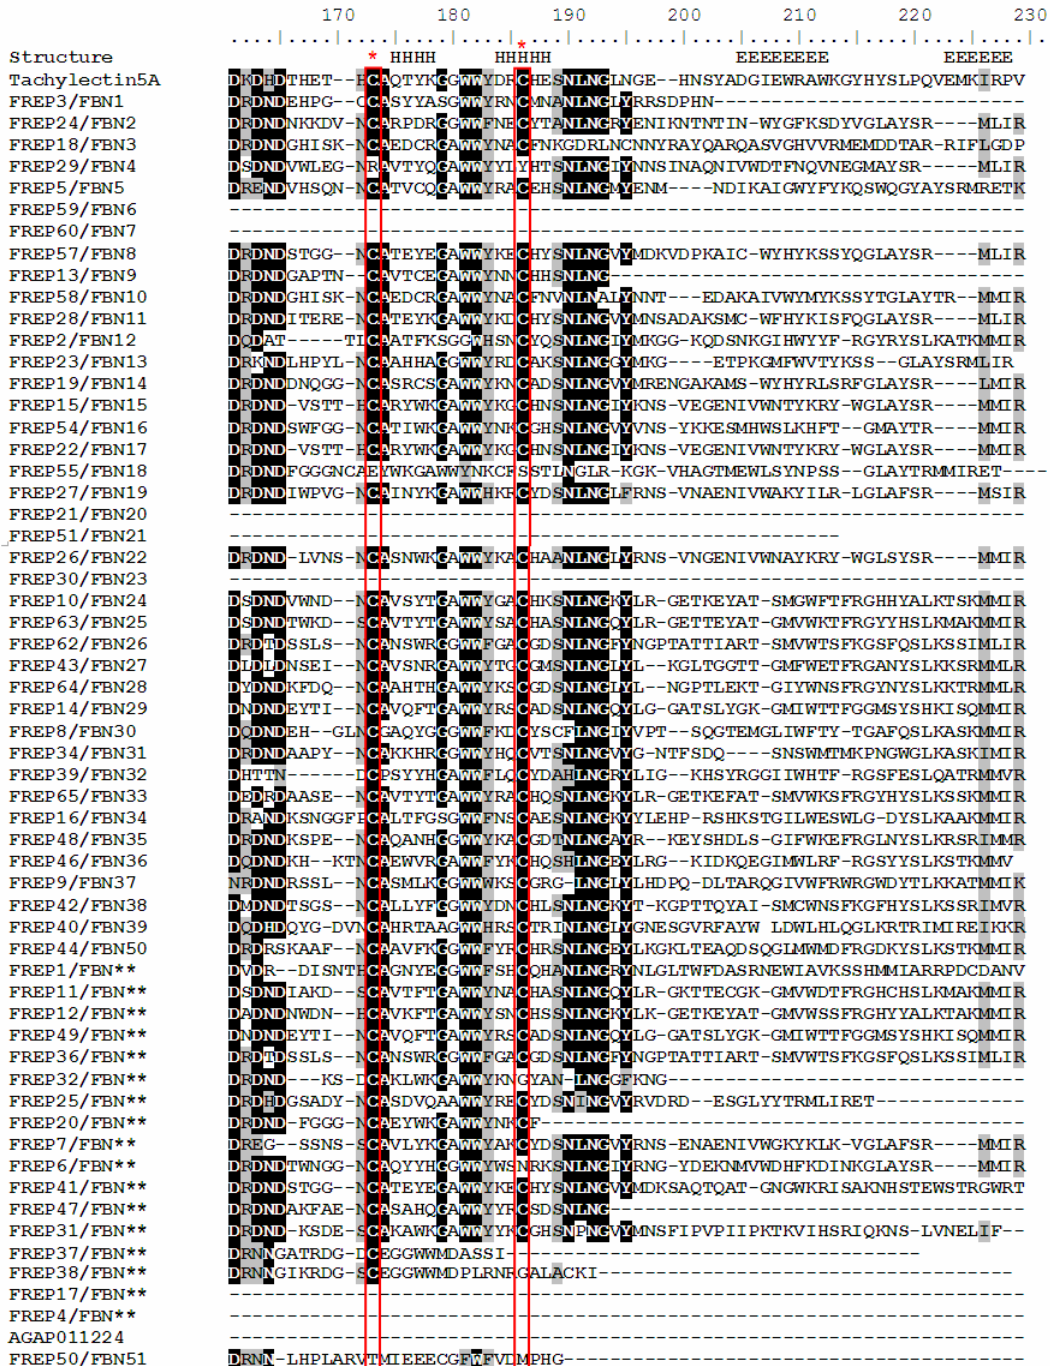

**Fig. S1. Multiple sequence alignment of FBG domains of total 59 members of *FREP* gene family in *A. gambiae*.** ClustalX program was used to construct the multiple sequence alignment. Sequences with over 60% identity were shaded with black box, and the PHD secondary structure is shown above with H indicating an  $\alpha$ -helix and E representing a  $\beta$  sheet. The four red boxes with asterisks are indicating the four conserved cysteine residues.

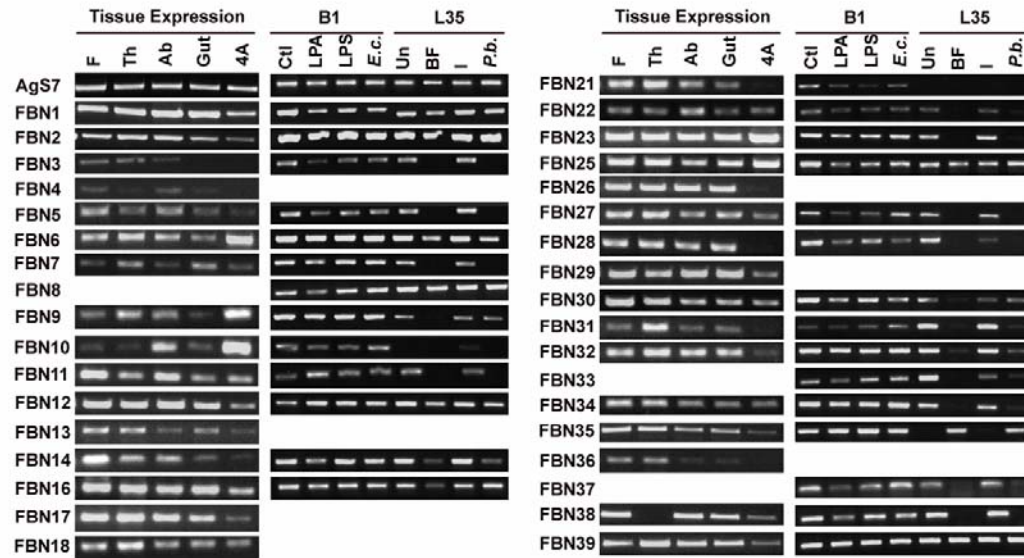

**Fig. S2.** RT-PCR analysis of *FREP* tissue specific expression in adult female *A. gambiae* Keele mosquitoes, and expression in cell line (B1) and *A. gambiae* L35 strain mosquitoes challenged with different elicitors. Agrose gels here were stained with ethidium bromide for visual presentation and with SYBR green for PCR product quantification were not shown here. F: total female mosquitoes; Th: Thorax; Ab: abdomen; 4A: *A. gambiae* cell line Sua4A; Ctl: PBS treated control; LPA: Alpha-lipoic acid; LPS: Lipopolysaccharide; *E.c.*: *E. coli* infected cells; Un: uninfected control mosquitoes; BF: non-infected human blood fed mosquitoes; I: control mosquitoes fed with human blood; *P.b.*: *P. berghei* infected mosquitoes. This figure represents one of three biological replicates.

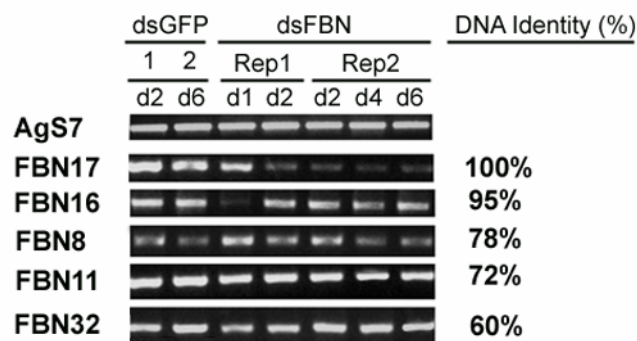

**Fig. S3.** Verification of RNAi gene-silencing efficiency with RT-PCR. *FREP* genes with high homology with targeted gene could be partially silenced, but the effect of gene silencing for non-targeted genes was not significant. dsGFP: control mosquitoes treated with *dsGFP* injection; dsFBN: gene silenced mosquitoes treated with *FBN17dsRNA* injection; d1-d6: days after *dsRNA* injection; Rep1 and Rep2 denotes for the biological replicate 1 and 2, respectively.
